# Supplementary material
Source: Royal Society of Chemistry journal article supplement (doi:10.1039/d6mh00684a)
Supplement: d6mh00684a1.pdf [file d6mh00684a1.pdf]

Supporting Information

## Visual Luminescence Thermometry Enabled by Phase-Transition-Activated Cross Relaxation of $Tb^{3+}$ Ions

L. Marciniak<sup>1\*</sup>, M. Szymczak<sup>1\*</sup>

<sup>1</sup> Institute of Low Temperature and Structure Research, Polish Academy of Sciences,

Okólna 2, 50-422 Wrocław, Poland

\* corresponding author: [l.marciniak@intibs.pl](mailto:l.marciniak@intibs.pl); [m.szymczak@intibs.pl](mailto:m.szymczak@intibs.pl)

**KEYWORDS** ratiometric thermometry, phase transition, thermal imaging, visual thermometry

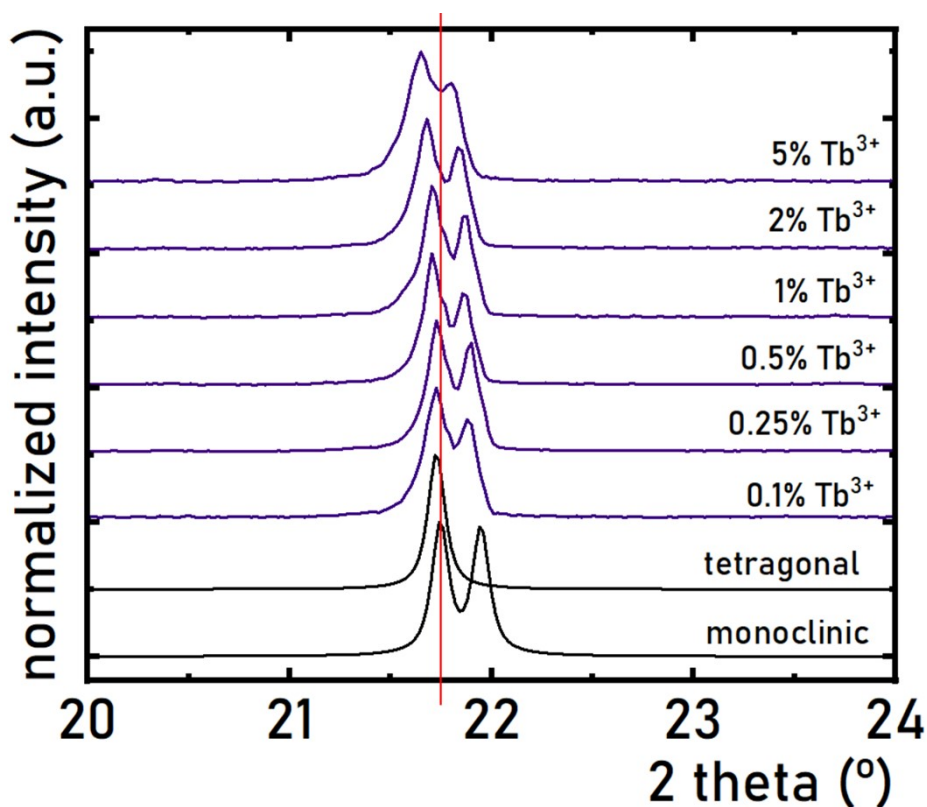

**Figure S1.** The zoom of the room temperature XRD spectra for  $LiYO_2:Tb^{3+}$  with different concentration of  $Tb^{3+}$  ions.

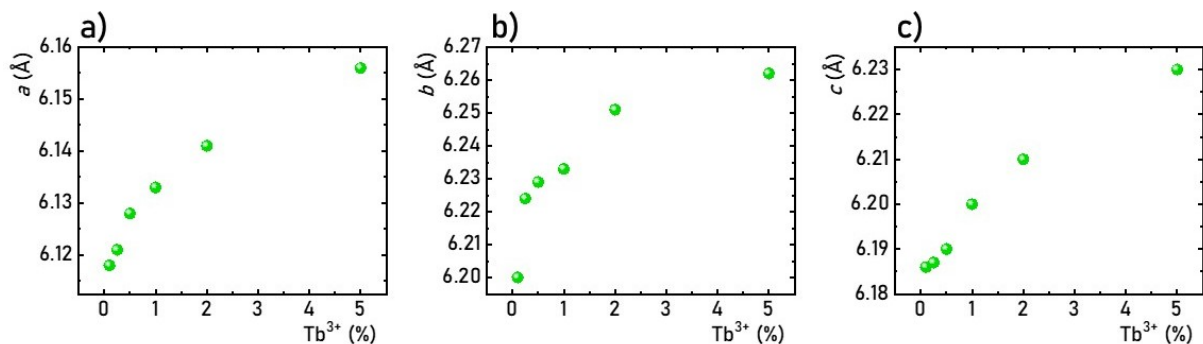

**Figure S2.** The influence of the Tb<sup>3+</sup> ions concentration on the unit cell parameters of LiYO<sub>2</sub>:Tb<sup>3+</sup> determined from Rietveld refinement of the room temperature XRD patterns.

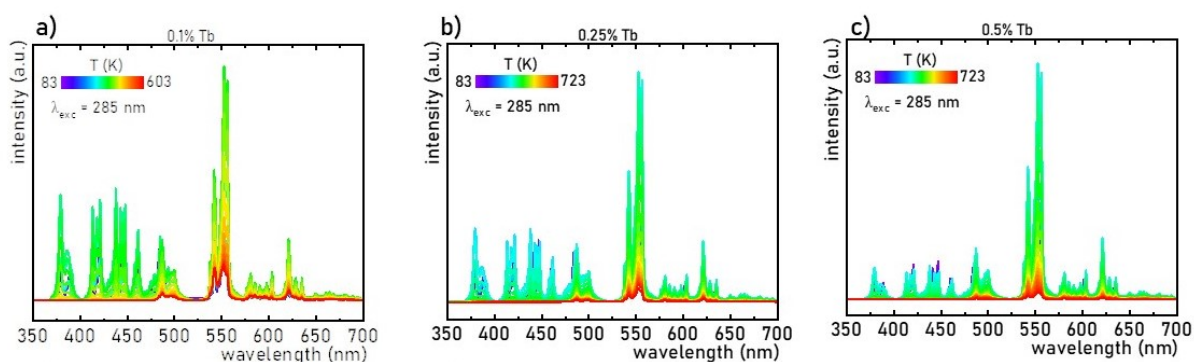

**Figure S3.** Thermal dependence of emission spectra of LiYO<sub>2</sub>:Tb<sup>3+</sup> doped with 0.1%Tb<sup>3+</sup> - a); 0.25%Tb<sup>3+</sup> - b) and 0.5%Tb<sup>3+</sup> - c).

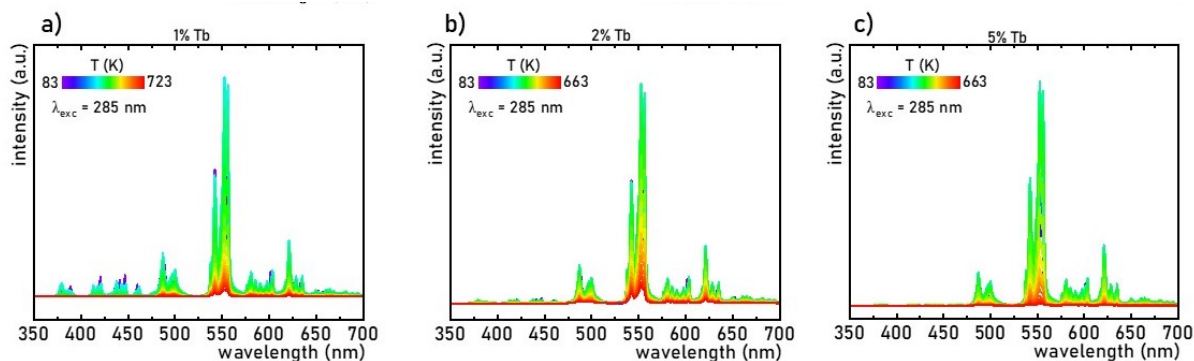

**Figure S4.** Thermal dependence of emission spectra of LiYO<sub>2</sub>:Tb<sup>3+</sup> doped with 1%Tb<sup>3+</sup> - a); 2%Tb<sup>3+</sup> - b) and 5%Tb<sup>3+</sup> - c).

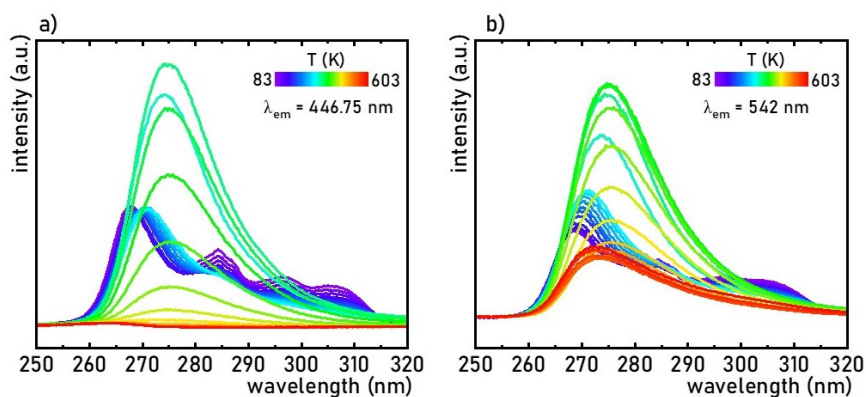

**Figure S5.** Thermal dependence of excitation spectra of  $\text{LiYO}_2:0.1\%\text{Tb}^{3+}$  measured for the emission from the  $^5\text{D}_3$  – a) and  $^5\text{D}_4$  – b) states.

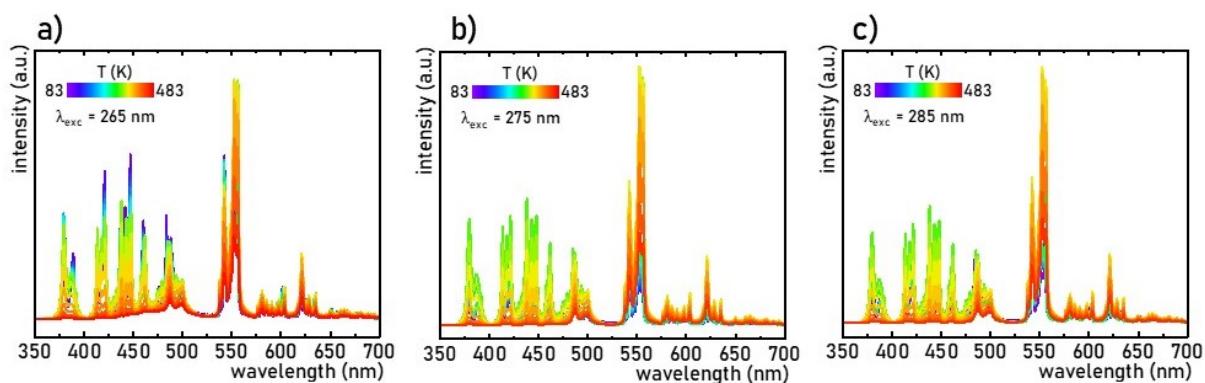

**Figure S6.** Thermal dependence of emission spectra of  $\text{LiYO}_2:0.1\%\text{Tb}^{3+}$  measured under  $\lambda_{\text{exc}}=265$  nm - a); under  $\lambda_{\text{exc}}=275$  nm - b) and under  $\lambda_{\text{exc}}=285$  nm - c).

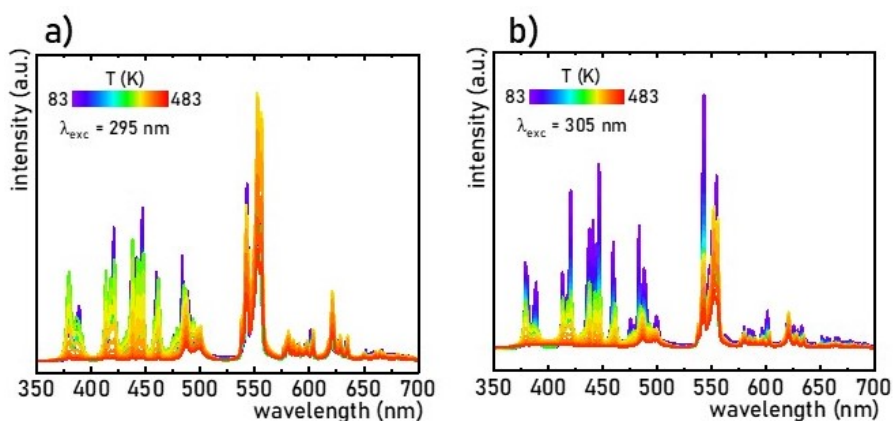

**Figure S7.** Thermal dependence of emission spectra of  $\text{LiYO}_2:0.1\%\text{Tb}^{3+}$  measured under  $\lambda_{\text{exc}}=295$  nm - a); under  $\lambda_{\text{exc}}=305$  nm - b).

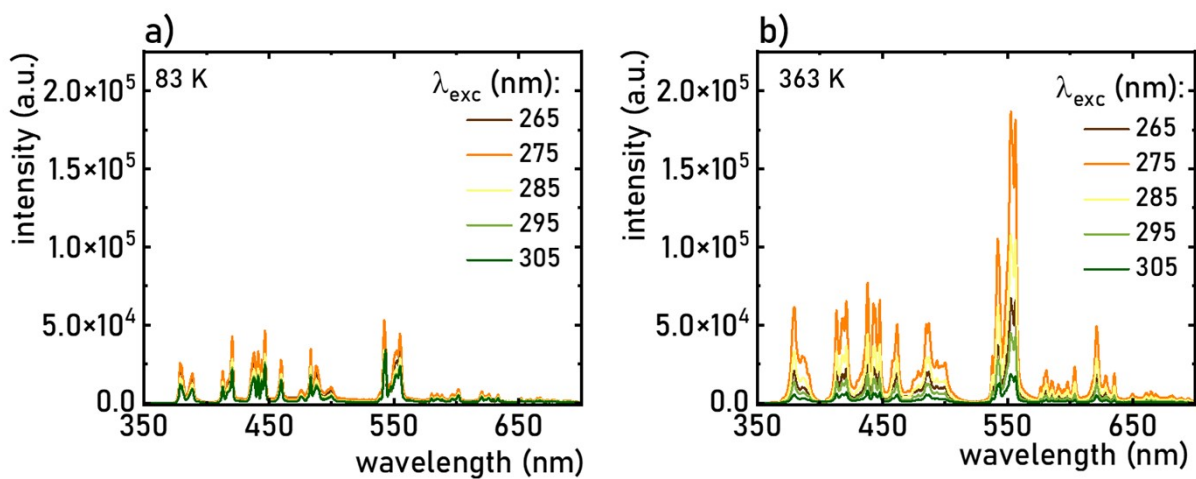

**Figure S8.** The comparison of the emission spectra of  $\text{LiYO}_2:0.1\%\text{Tb}^{3+}$  measured upon different excitation wavelengths at 83K- a) and 363K – b).

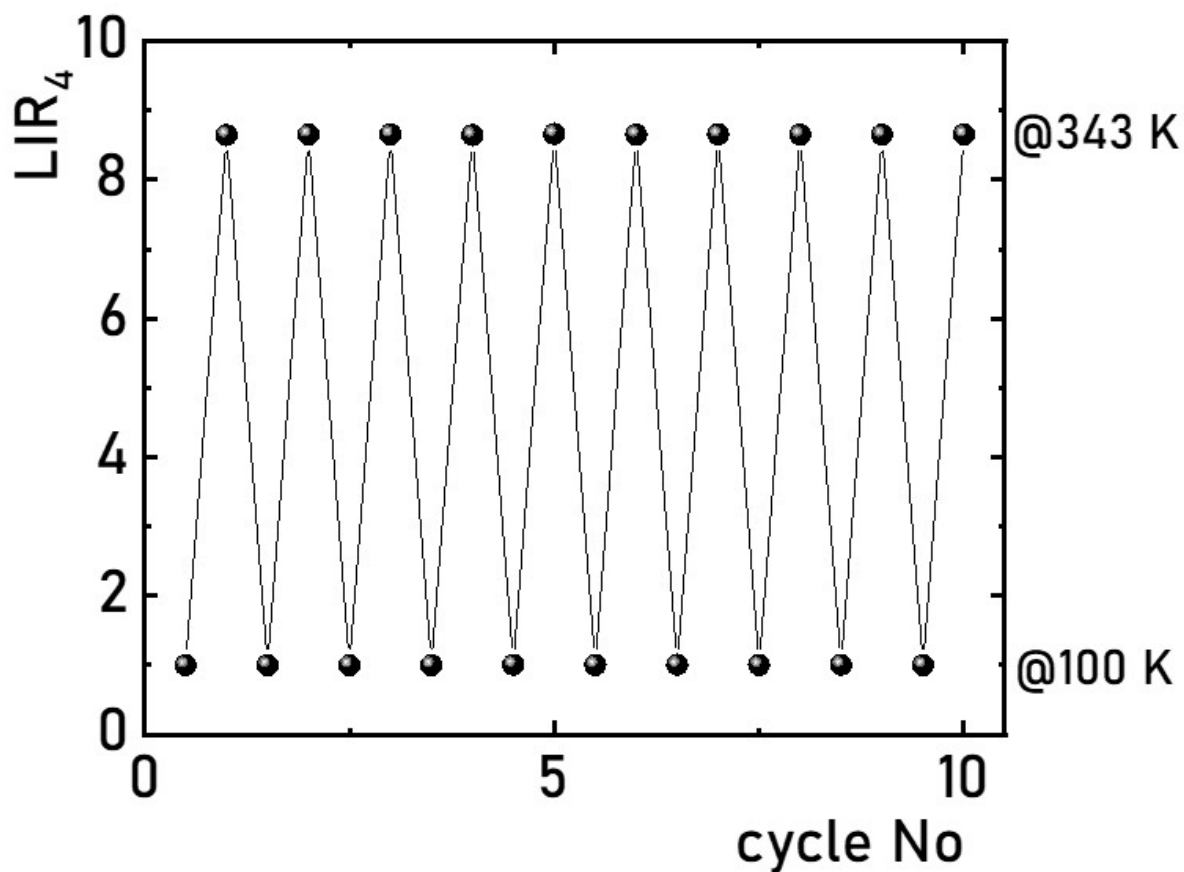

**Figure S9.** The  $LIR_4$  for  $\text{LiYO}_2:0.1\%\text{Tb}^{3+}$  within heating cooling cycles between 100 K and 343 K.

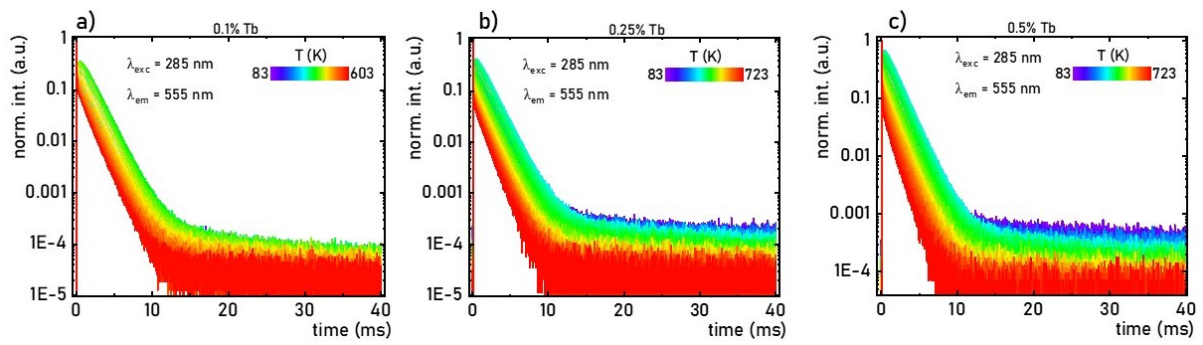

**Figure S10.** Thermal dependence of luminescence decay profiles measured for the emission from  $^5D_4$  state of  $\text{LiYO}_2:\text{Tb}^{3+}$  doped with 0.1% $\text{Tb}^{3+}$  - a); 0.25% $\text{Tb}^{3+}$  - b) and 0.5% $\text{Tb}^{3+}$  - c).

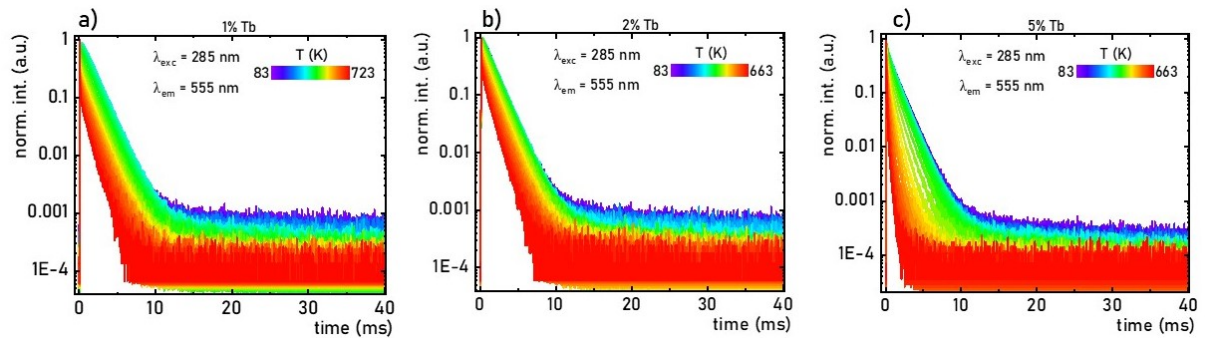

**Figure S11.** Thermal dependence of luminescence decay profiles measured for the emission from  $^5D_4$  state of  $\text{LiYO}_2:\text{Tb}^{3+}$  doped with 1% $\text{Tb}^{3+}$  - a); 2% $\text{Tb}^{3+}$  - b) and 5% $\text{Tb}^{3+}$  - c).

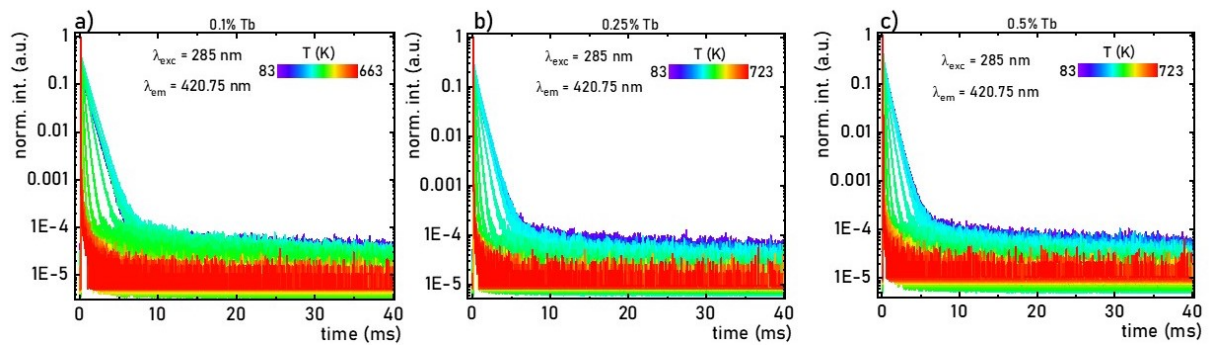

**Figure S12.** Thermal dependence of luminescence decay profiles measured for the emission from  $^5D_3$  state of  $\text{LiYO}_2:\text{Tb}^{3+}$  doped with 0.1% $\text{Tb}^{3+}$  - a); 0.25% $\text{Tb}^{3+}$  - b) and 0.5% $\text{Tb}^{3+}$  - c).

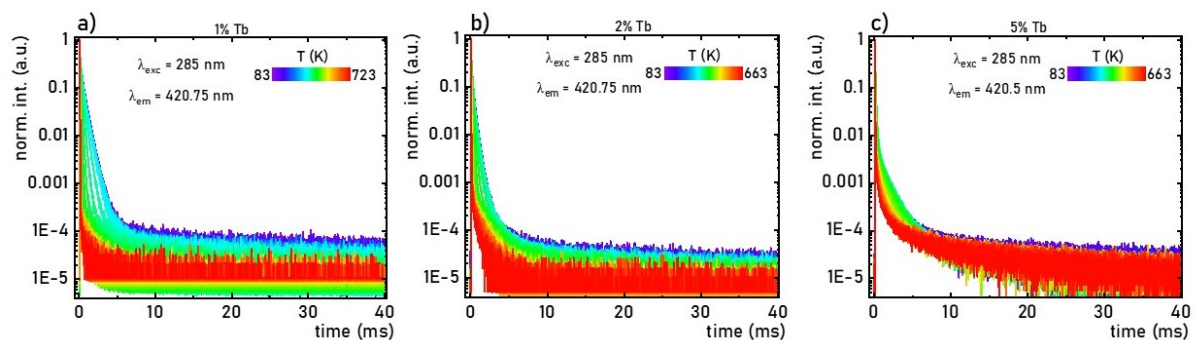

**Figure S13.** Thermal dependence of luminescence decay profiles measured for the emission from  $^5D_3$  state of  $\text{LiYO}_2:\text{Tb}^{3+}$  doped with 1% $\text{Tb}^{3+}$  - a); 2% $\text{Tb}^{3+}$  - b) and 5% $\text{Tb}^{3+}$  - c).

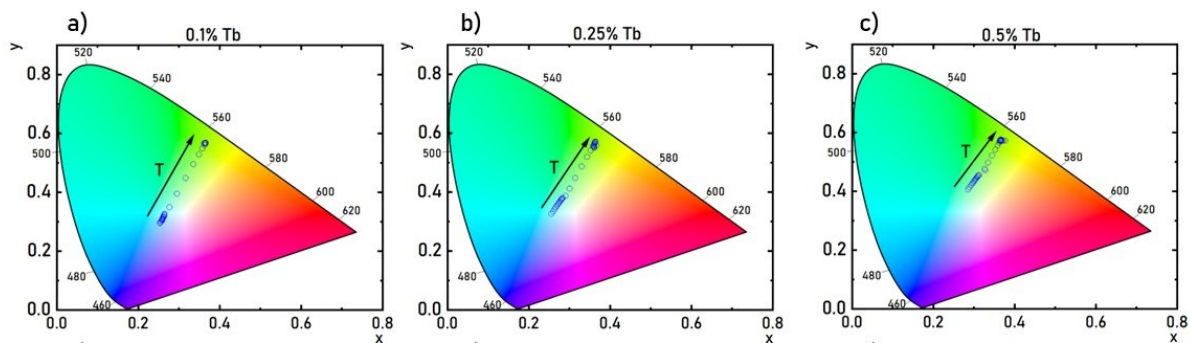

**Figure S14.** Thermal dependence of CIE1931 of  $\text{LiYO}_2:\text{Tb}^{3+}$  doped with 0.1% $\text{Tb}^{3+}$  - a); 0.25% $\text{Tb}^{3+}$  - b) and 0.5% $\text{Tb}^{3+}$  - c).

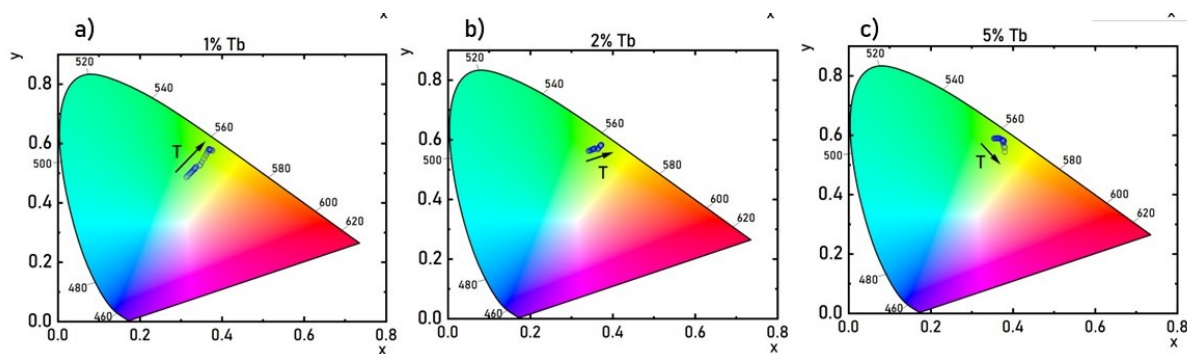

**Figure S15.** Thermal dependence of CIE1931 of  $\text{LiYO}_2:\text{Tb}^{3+}$  doped with 1% $\text{Tb}^{3+}$  - a); 2% $\text{Tb}^{3+}$  - b) and 5% $\text{Tb}^{3+}$  - c).

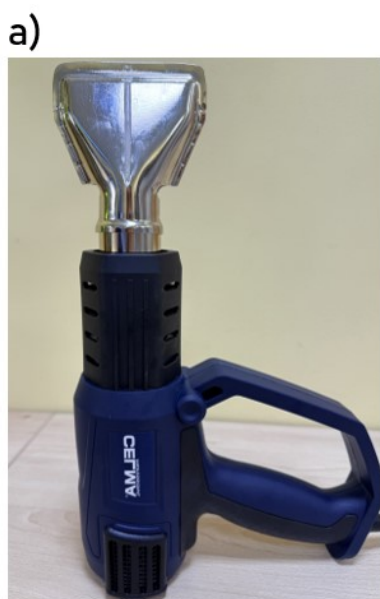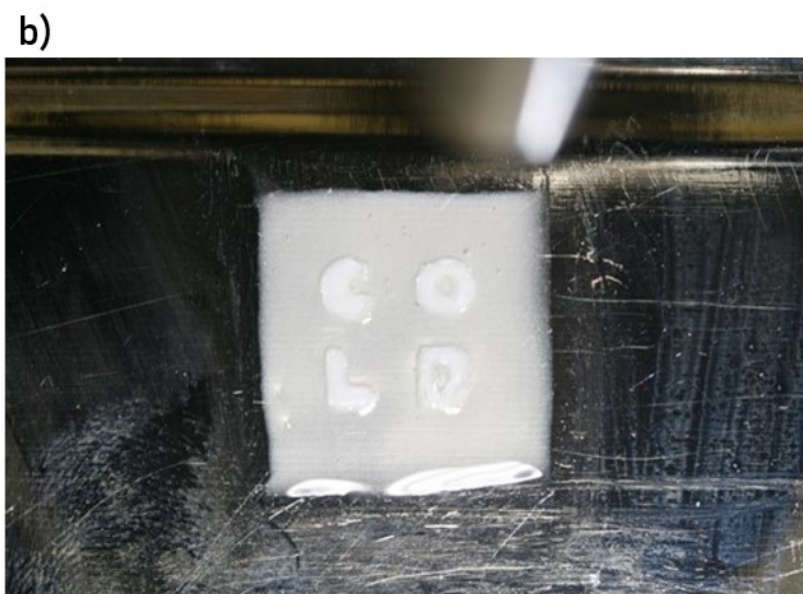

**Figure S16.** The bright field photo of the heat gun used in the proof of concept experiment – a) and the pattern made of the  $\text{LiYO}_2:0.1\%\text{Tb}^{3+}$  (letters COLD) and  $\text{LiYO}_2:2\%\text{Tb}^{3+}$  (background) – b).

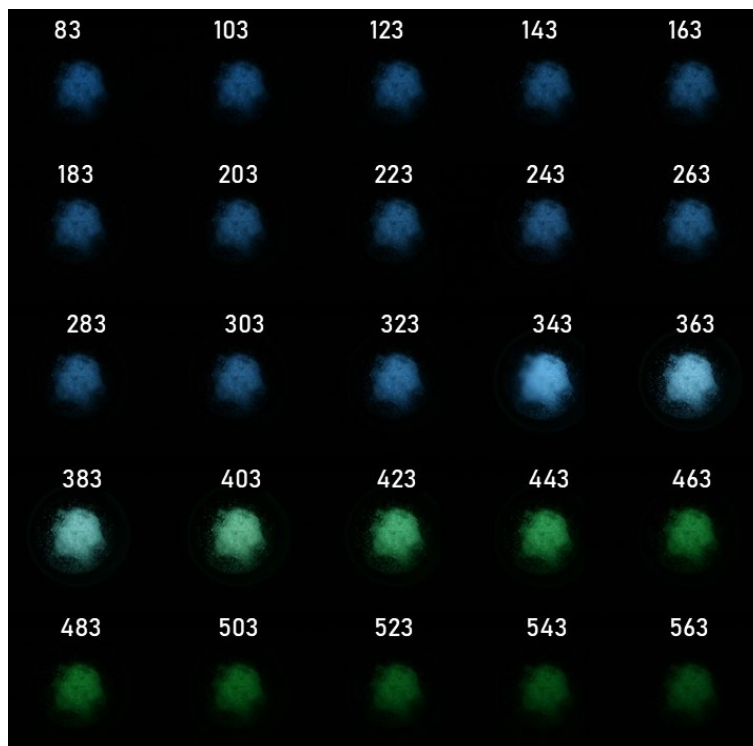

**Figure S17.** Photos of luminescence from  $\text{LiYO}_2:0.1\%\text{Tb}^{3+}$  obtained under  $\lambda_{\text{exc}}=285$  nm at different temperatures.

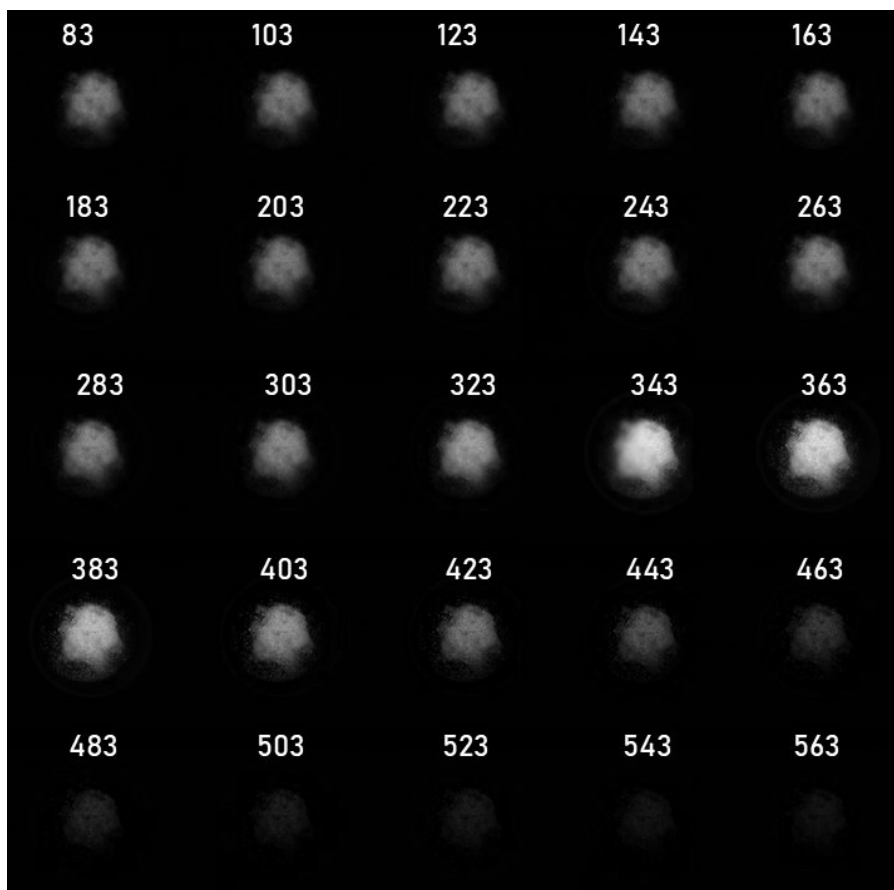

**Figure S18.** Intensity recorded in B channel from photos of luminescence from  $\text{LiYO}_2:0.1\%\text{Tb}^{3+}$  obtained under  $\lambda_{\text{exc}}=285$  nm at different temperatures.

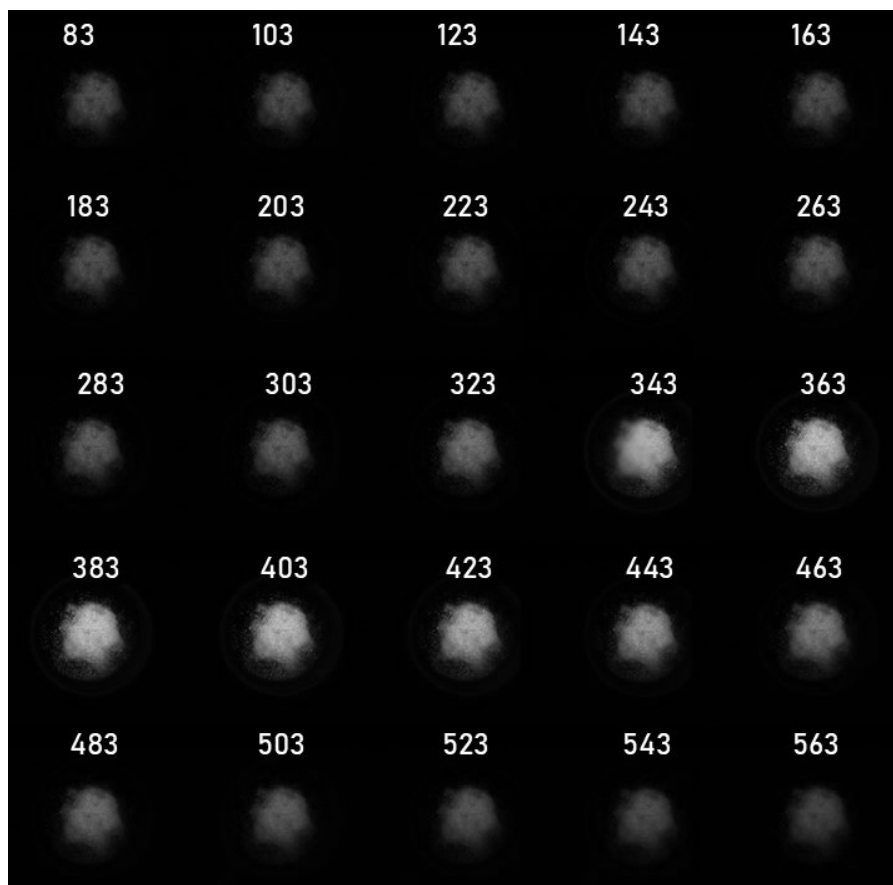

**Figure S19.** Intensity recorded in G channel from photos of luminescence from  $\text{LiYO}_2:0.1\%\text{Tb}^{3+}$  obtained under  $\lambda_{\text{exc}}=285$  nm at different temperatures.

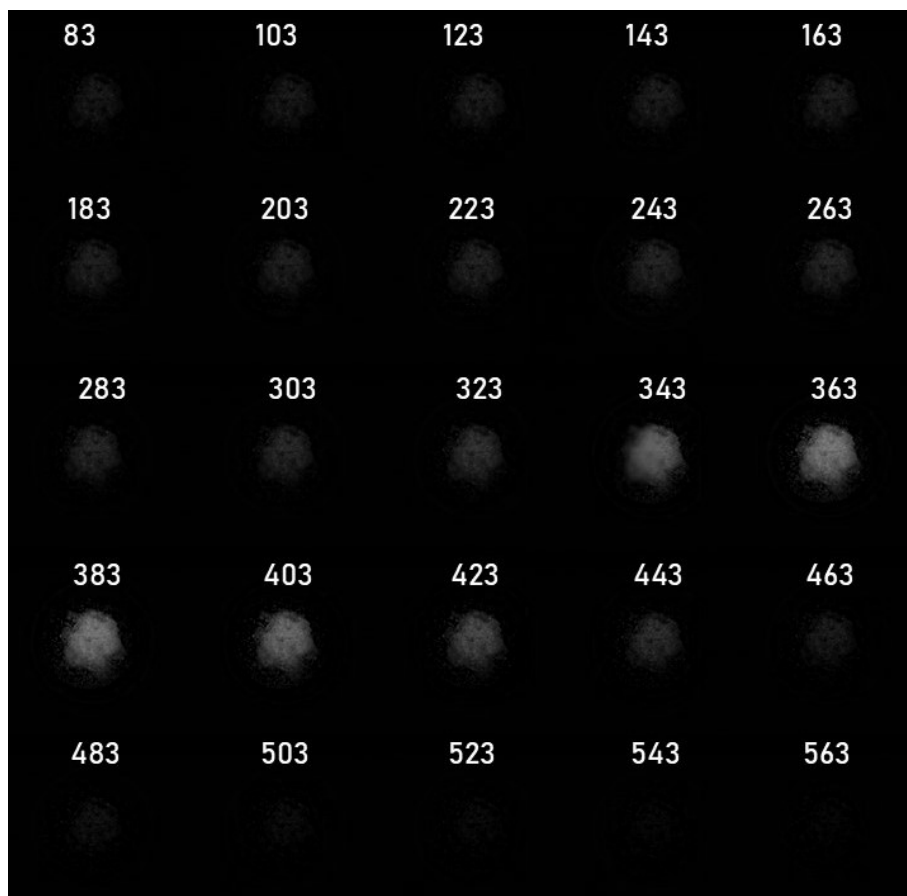

**Figure S20.** Intensity recorded in R channel from photos of luminescence from  $\text{LiYO}_2:0.1\%\text{Tb}^{3+}$  obtained under  $\lambda_{\text{exc}}=285$  nm at different temperatures.

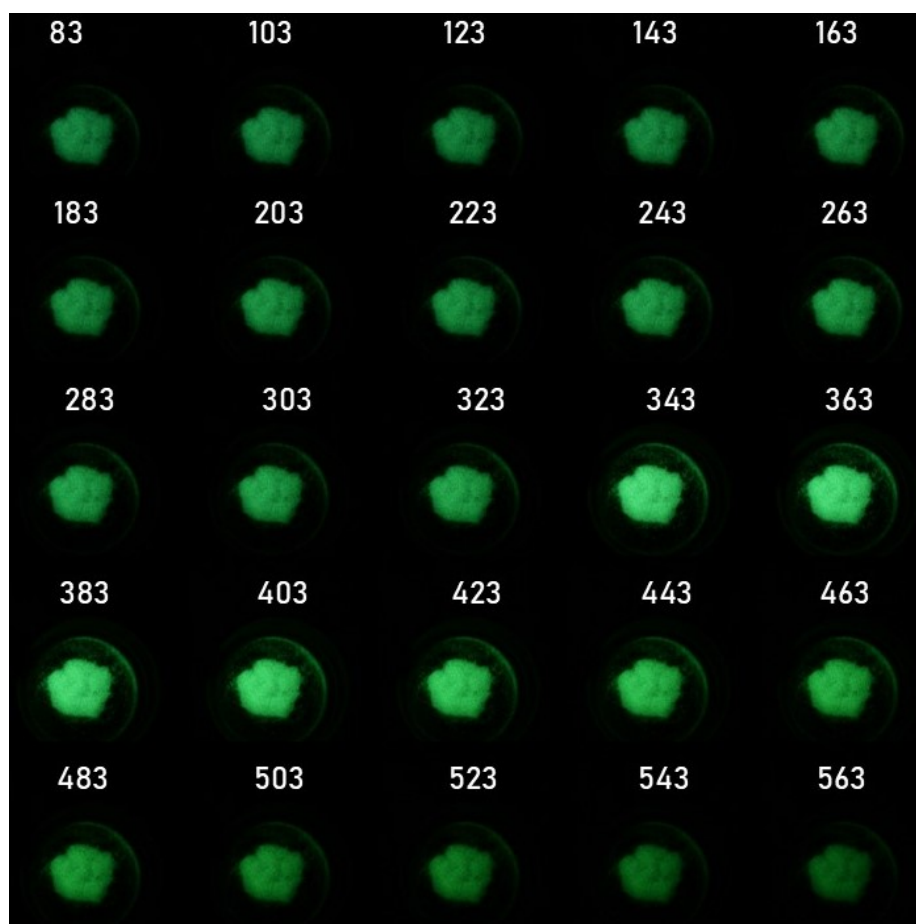

**Figure S21.** Photos of luminescence from  $\text{LiYO}_2:2\%\text{Tb}^{3+}$  obtained under  $\lambda_{\text{exc}}=285$  nm at different temperatures.

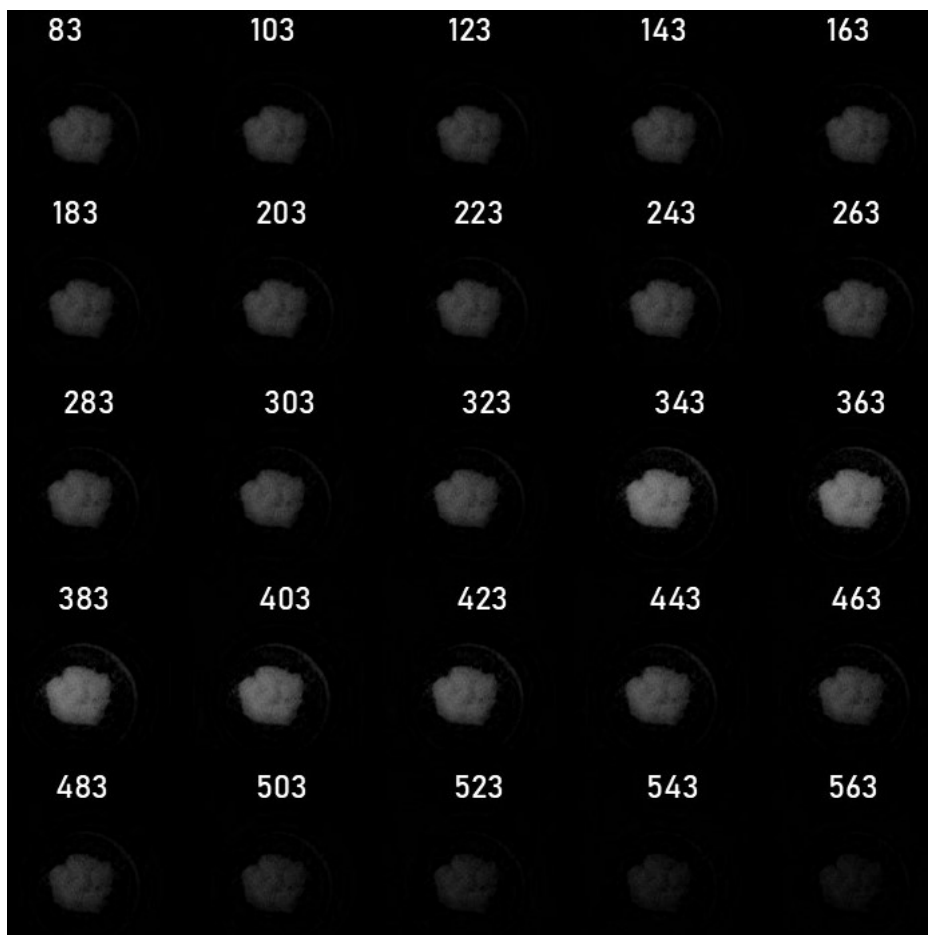

**Figure S22.** Intensity recorded in B channel from photos of luminescence from  $\text{LiYO}_2:2\%\text{Tb}^{3+}$  obtained under  $\lambda_{\text{exc}}=285$  nm at different temperatures.

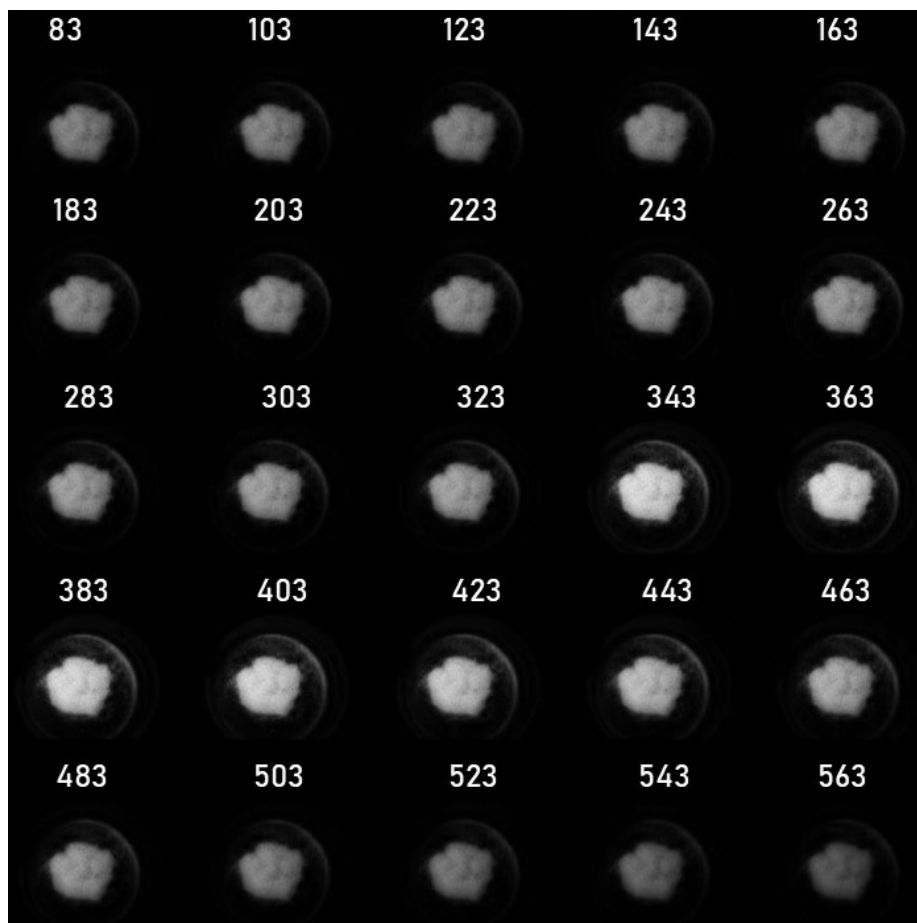

**Figure S23.** Intensity recorded in G channel from photos of luminescence from  $\text{LiYO}_2:2\%\text{Tb}^{3+}$  obtained under  $\lambda_{\text{exc}}=285$  nm at different temperatures.

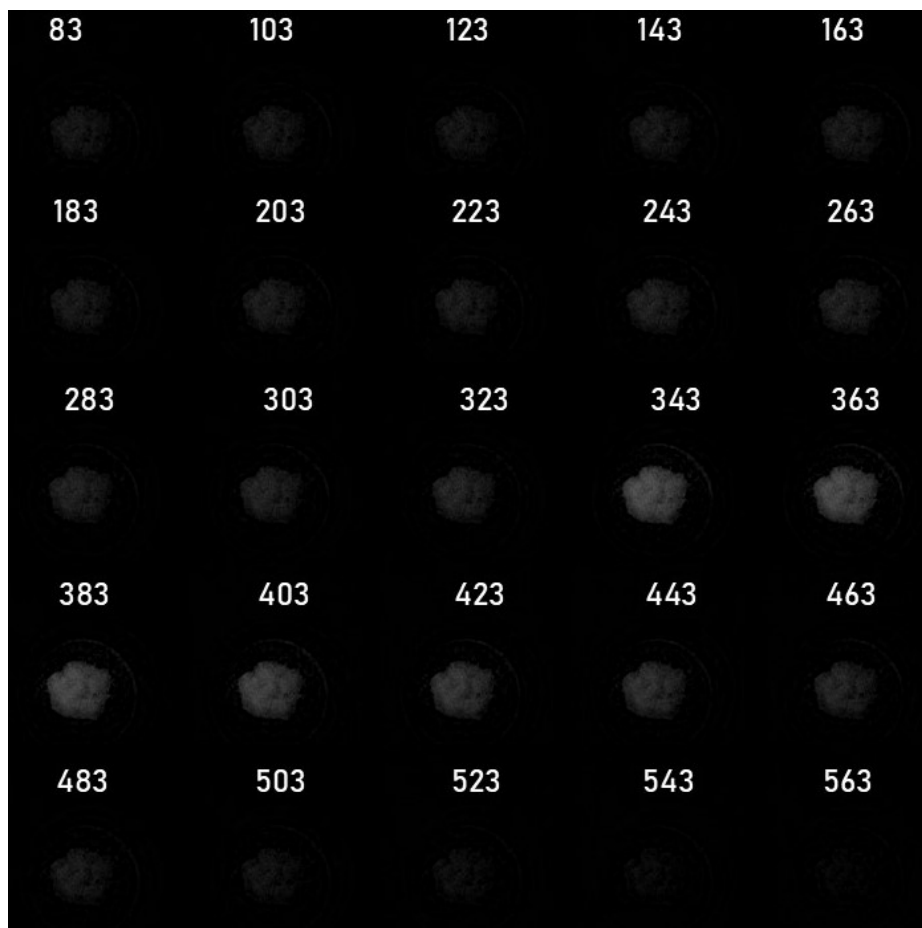

**Figure S24.** Intensity recorded in R channel from photos of luminescence from  $\text{LiYO}_2:2\%\text{Tb}^{3+}$  obtained under  $\lambda_{\text{exc}}=285$  nm at different temperatures.

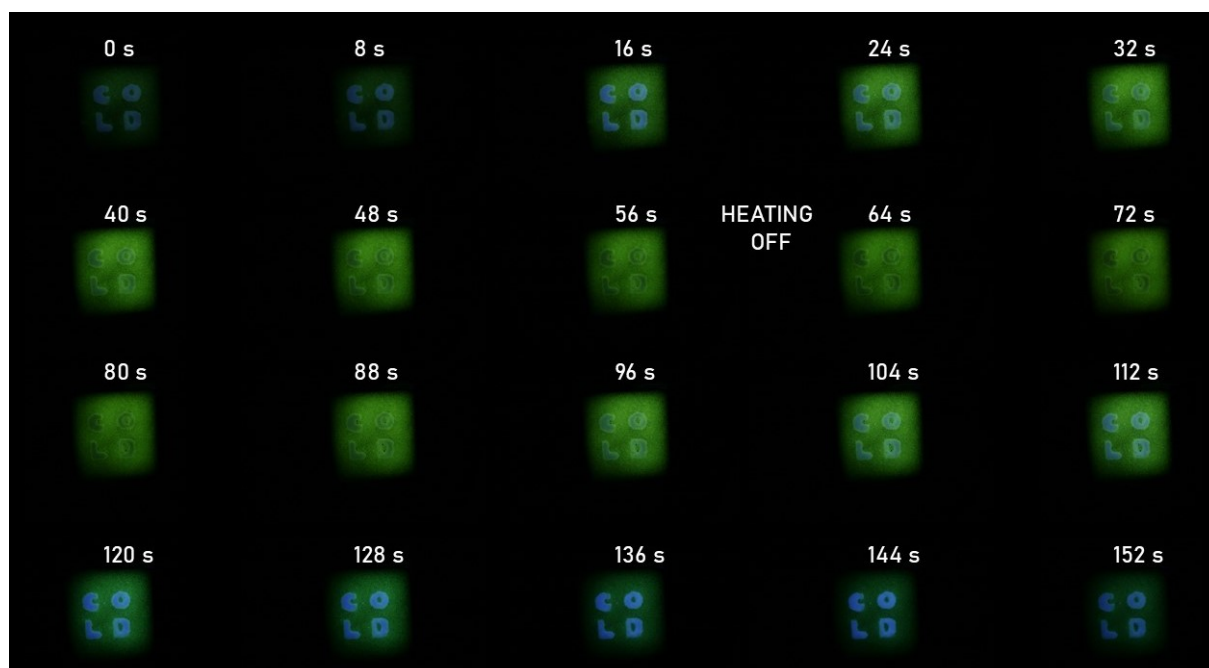

**Figure S25.** Photos of the luminescence from the pattern obtained as a function of time after turning of the heat gun.

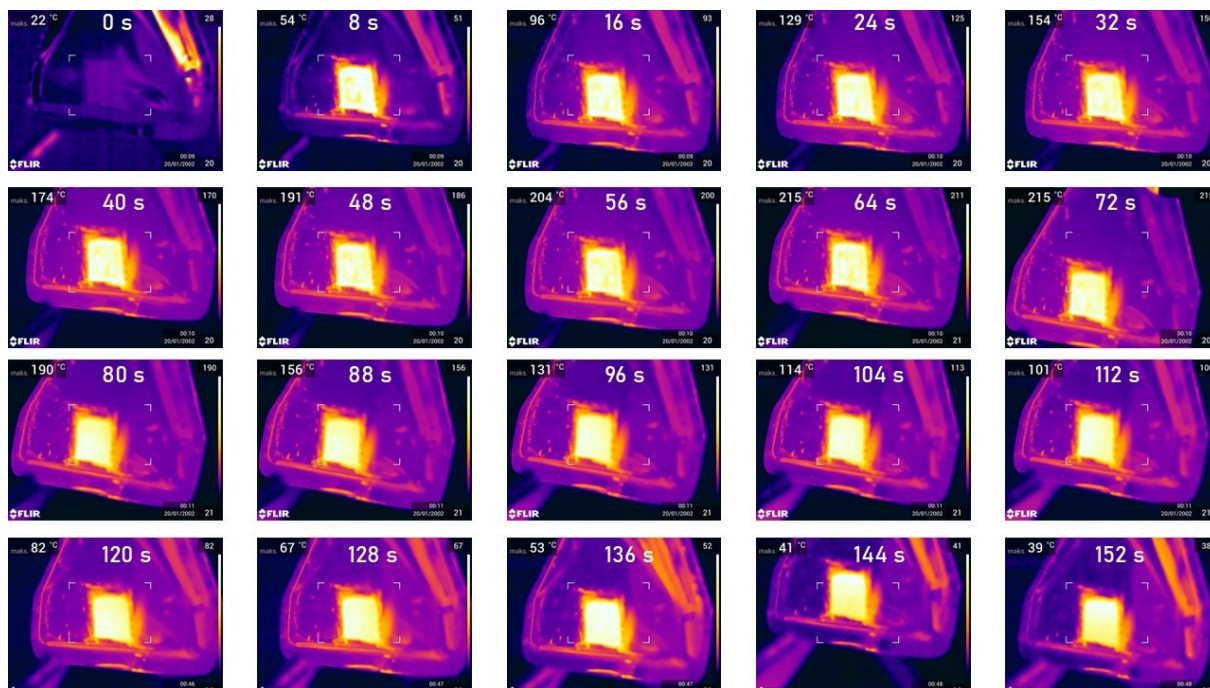

**Figure S26.** Photos from the thermovision camera of the pattern obtained as a function of time after turning of the heat gun.

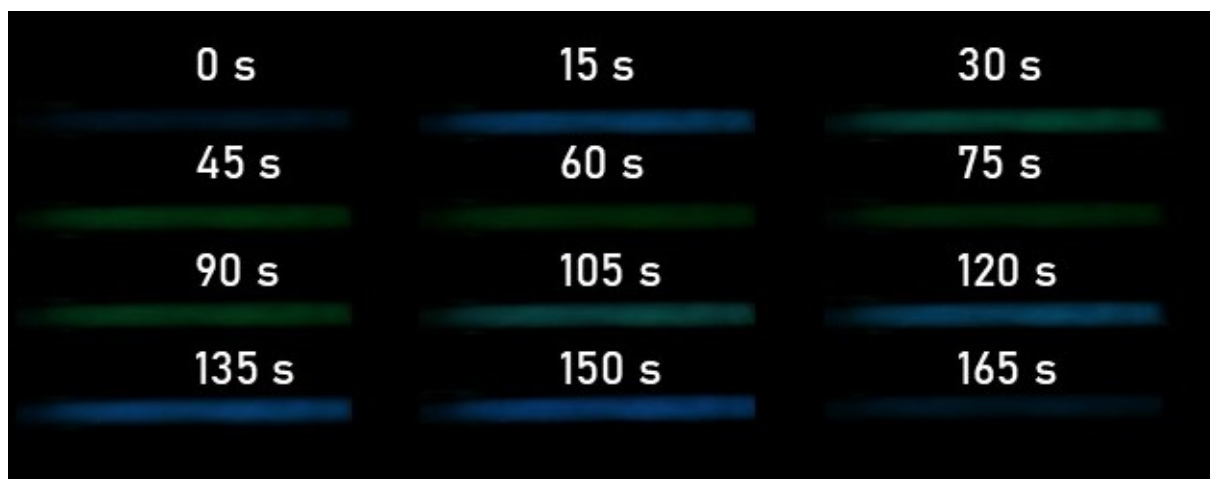

**Figure S27.** Photos of the luminescence of the strip of  $\text{LiYO}_2:0.1\%\text{Tb}^{3+}$  phosphor deposited on the metal nozzle of the heat gun captured as a function of time.

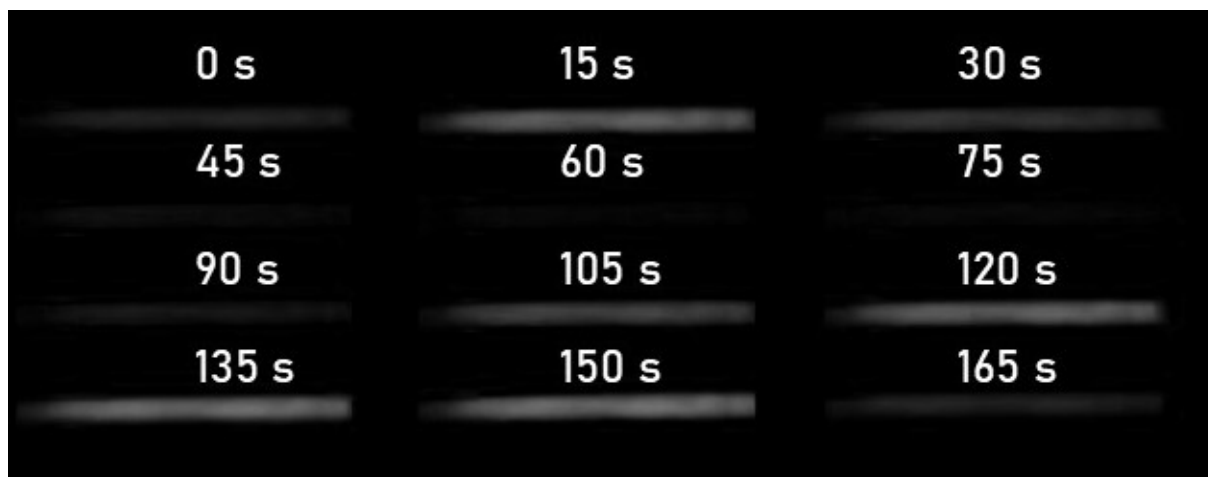

**Figure S28.** The intensity maps recorded in the B channel obtained from photos of the luminescence of the strip of  $\text{LiYO}_2:0.1\%\text{Tb}^{3+}$  phosphor deposited on the metal nozzle of the heat gun captured as a function of time.

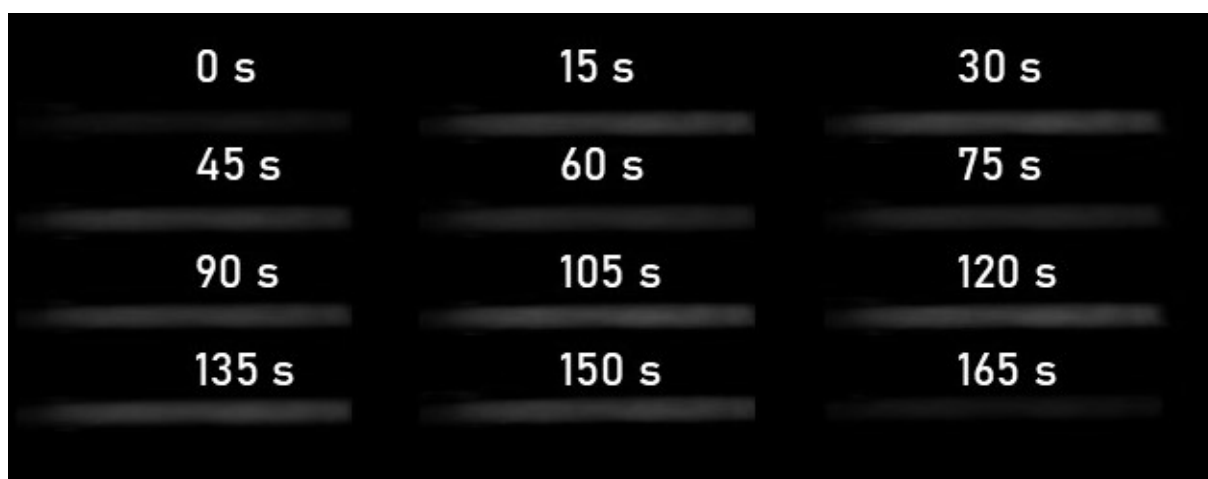

**Figure S29.** The intensity maps recorded in the G channel obtained from photos of the luminescence of the strip of  $\text{LiYO}_2:0.1\%\text{Tb}^{3+}$  phosphor deposited on the metal nozzle of the heat gun captured as a function of time.

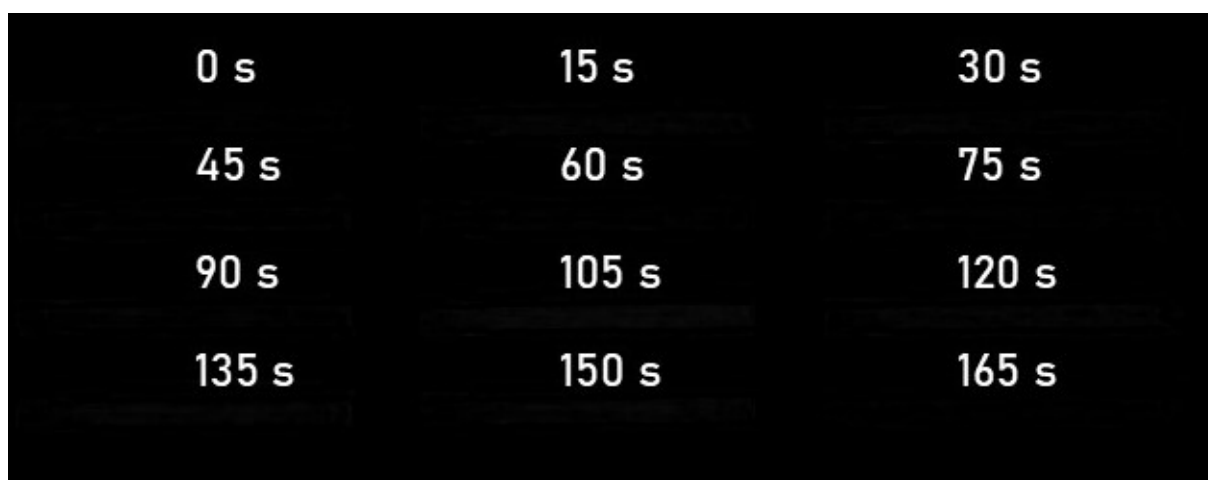

**Figure S30.** The intensity maps recorded in the R channel obtained from photos of the luminescence of the strip of  $\text{LiYO}_2:0.1\%\text{Tb}^{3+}$  phosphor deposited on the metal nozzle of the heat gun captured as a function of time.

Calibration curve used to convert G/B maps into thermal maps:

$$T = 92.29 + 0.04241 \cdot (G/B) - 2.17 \cdot 10^{-6} \cdot (G/B)^2 + 5.11 \cdot 10^{-11} \cdot (G/B)^3 - 4.25 \cdot 10^{-16} \cdot (G/B)^4 \quad (\text{S1})$$

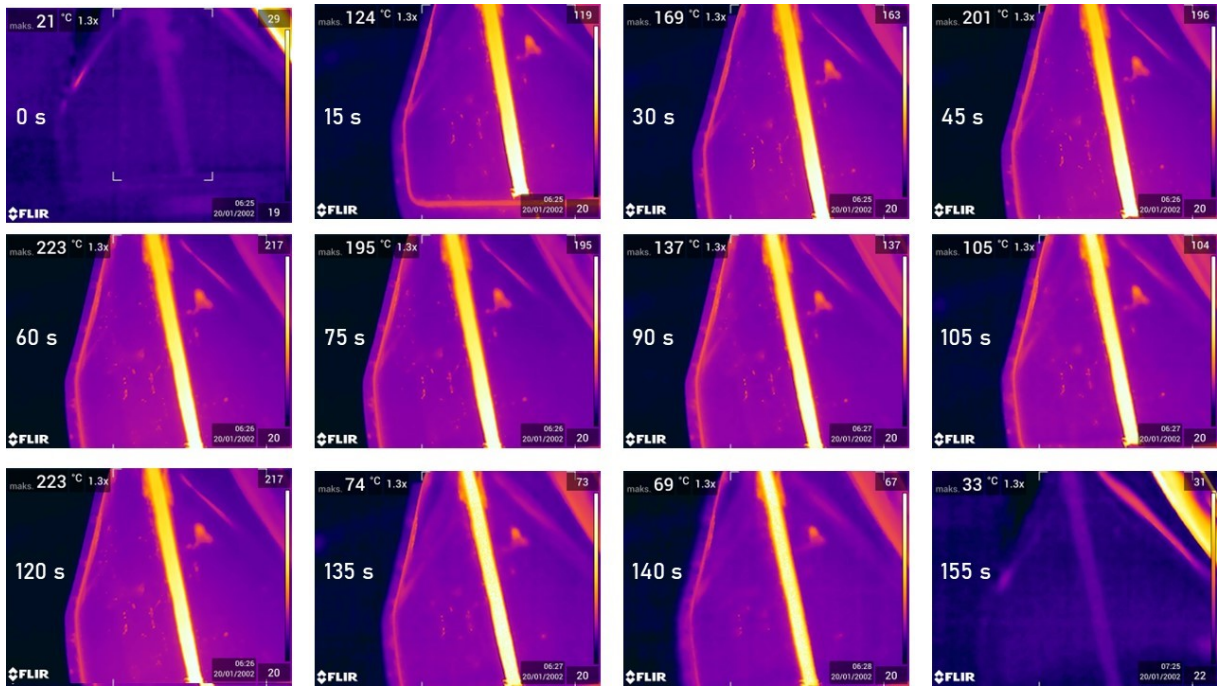

**Figure S31.** Photos from the thermovision camera of the luminescence of the strip of  $\text{LiYO}_2:0.1\%\text{Tb}^{3+}$  phosphor deposited on the metal nozzle of the heat gun captured as a function of time.
